# Supplementary material for: Variants of active assist robotic therapy: Feasibility of Virtual Assistance and Proprioceptive Training as gauged by their effects on success and motivation during finger movement training after stroke
Source: Research Square preprint supplement (doi:10.21203/rs.3.rs-5702495/v1), 2025-04-15
Supplement: Supplementary file 1 [file 9946cfed82ddf83304593ffb.docx]

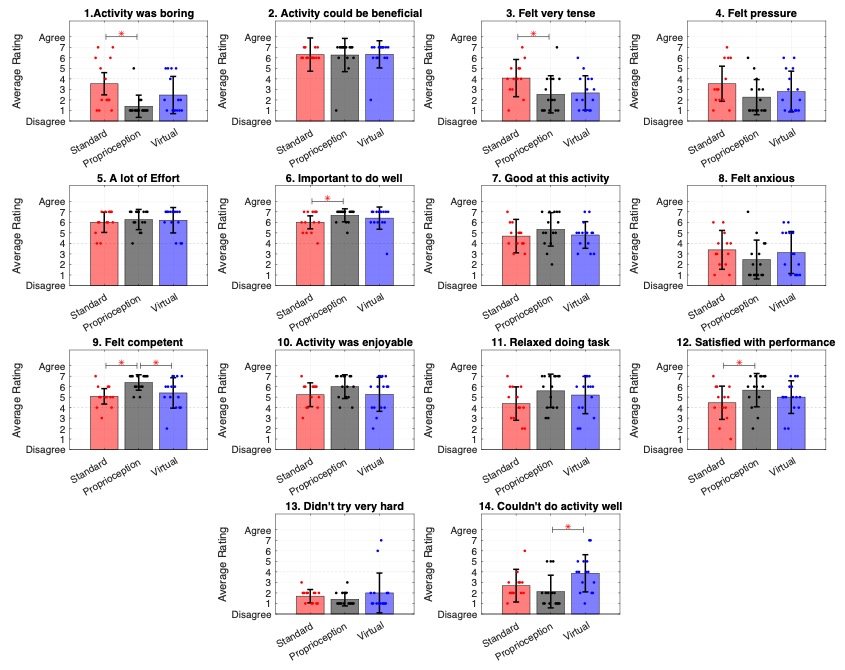


Supplemental Figure : Subject responses across all 14 questions of the abbreviated IMI Questionnaire. The IMI Subscales reported in the main text were comprised of the average response values to questions as follows: Value/Usefullness comprised responses to question 2, Effort/Importance comprised responses to questions 5, 6, and 13, Competency comprised responses to questions 7, 9, 12, 14, Interest/Enjoyment comprised responses to questions 1 and 10, and Pressure/Tension comprised responses to questions 3, 4, 8 and 11. For averaging, responses to questions 1, 3, 4, 8,13, and 14, were scored as 7-the response value, such that all responses were affirmatory of the Subscale header.
